# Supplementary material for: Marked changes in diversity and relative activity of picoeukaryotes with depth in the world ocean
Source: PubMed Central journal article supplement (PMC6976695; doi:10.1038/s41396-019-0506-9), 2019-10-23
Supplement: 41396_2019_506_MOESM1_ESM.pdf [file 41396_2019_506_MOESM1_ESM.pdf]

## SUPPLEMENTARY FIGURES

**Figure S1.** World map showing the location of the Malaspina stations sampled for this study. Red triangles represent stations containing Oxygen Minimum Zone (OMZ) samples.

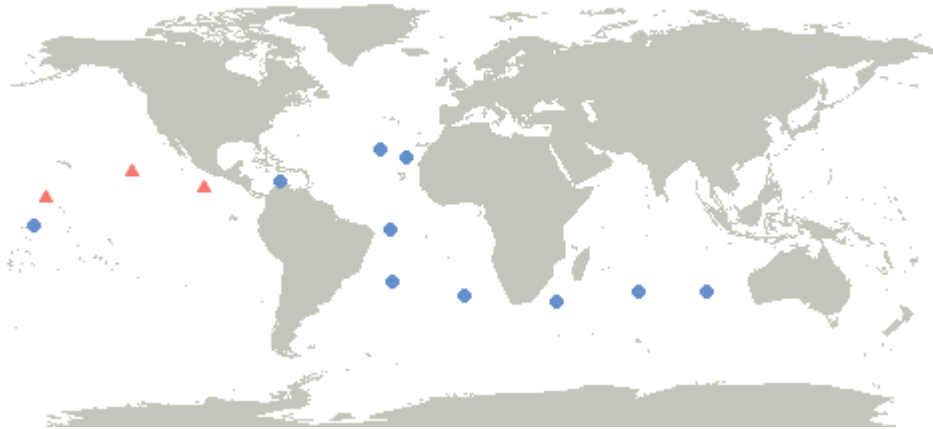

**Figure S2.** Alpha diversity of picoeukaryotic communities in the different water layers using the rRNA (upper boxplots) and rDNA (lower boxplots) datasets. (a) OTU richness and (b) Shannon Index ( $H'$ ). Significant differences were found between photic and aphotic layers..

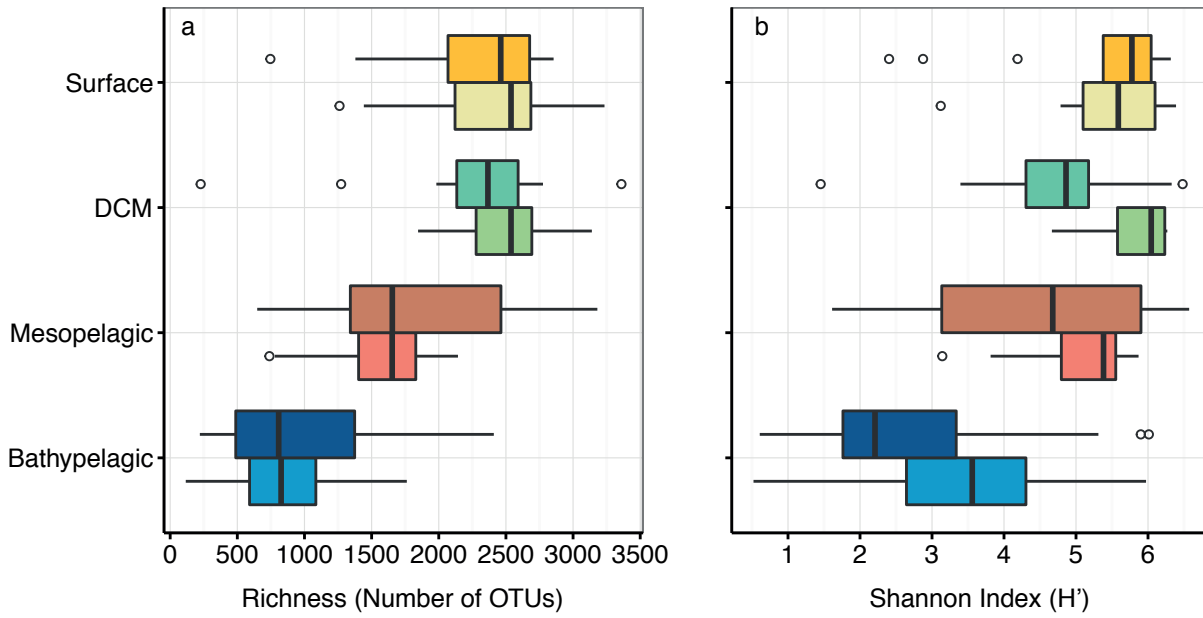

**Figure S3.** Richness of picoeukaryotic communities in samples from different water layers of each ocean basin using the rRNA (upper boxplots) and rDNA (lower boxplots) datasets.

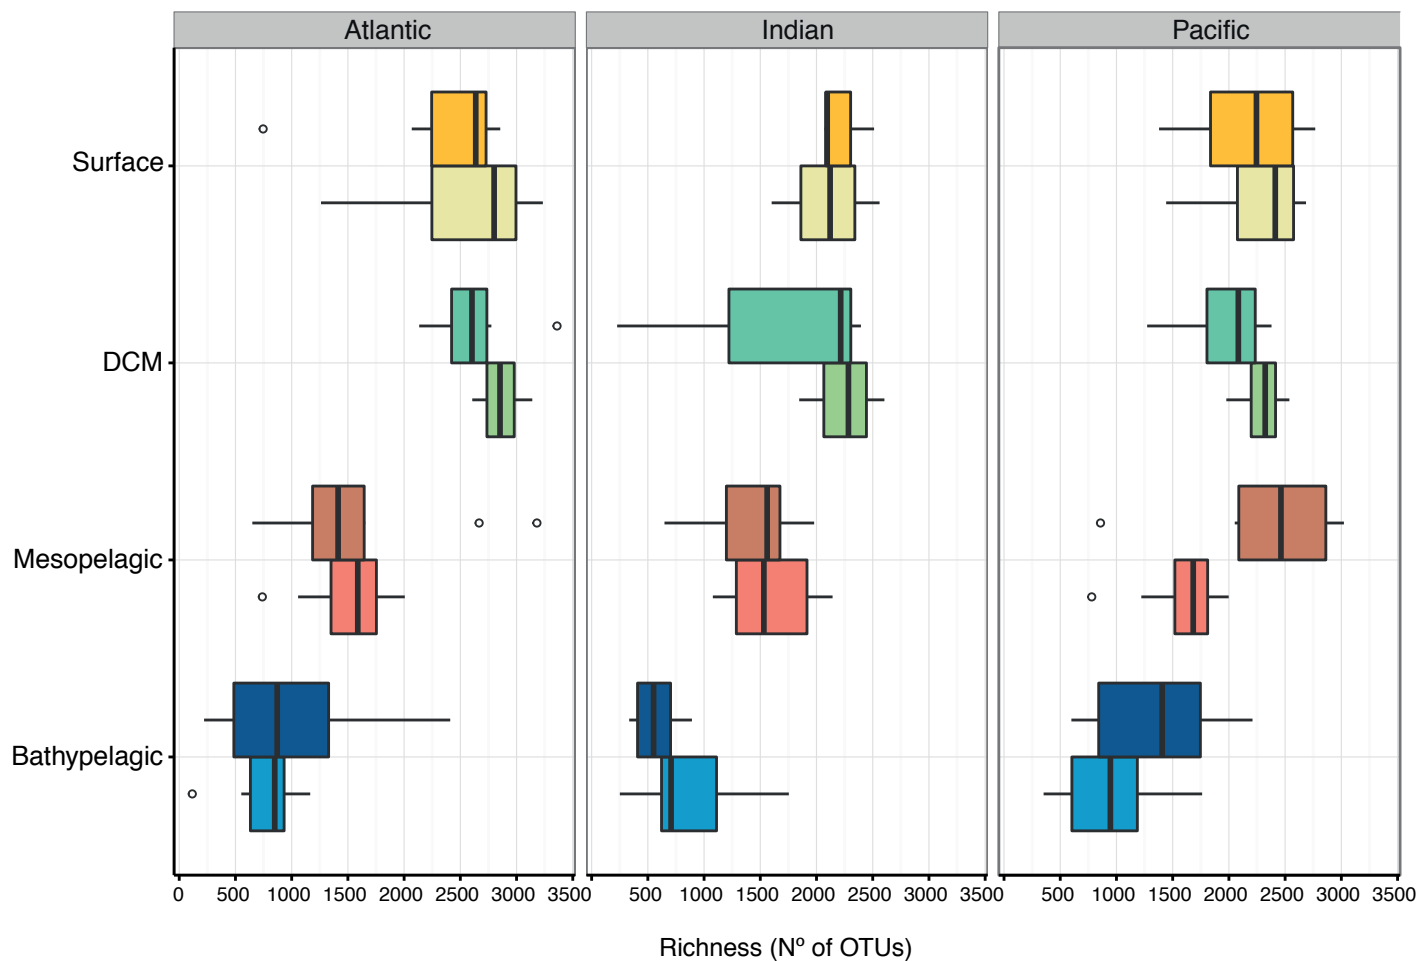

**Figure S4.** Clustering of all picoeukaryotic samples in a non-metric multidimensional scaling (NMDS) plot. Each sample is colored according to the depth layer and has different symbol shape according to the type of dataset (rDNA or rRNA).

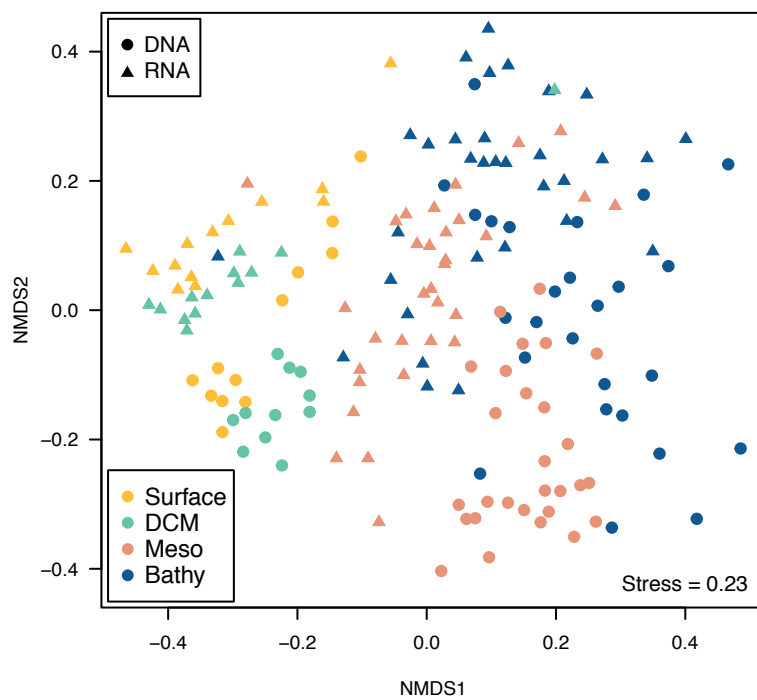

**Figure S5.** Dendrogram of the picoeukaryotic samples for the RNA and DNA dataset. Each sample is colored according to their ocean.

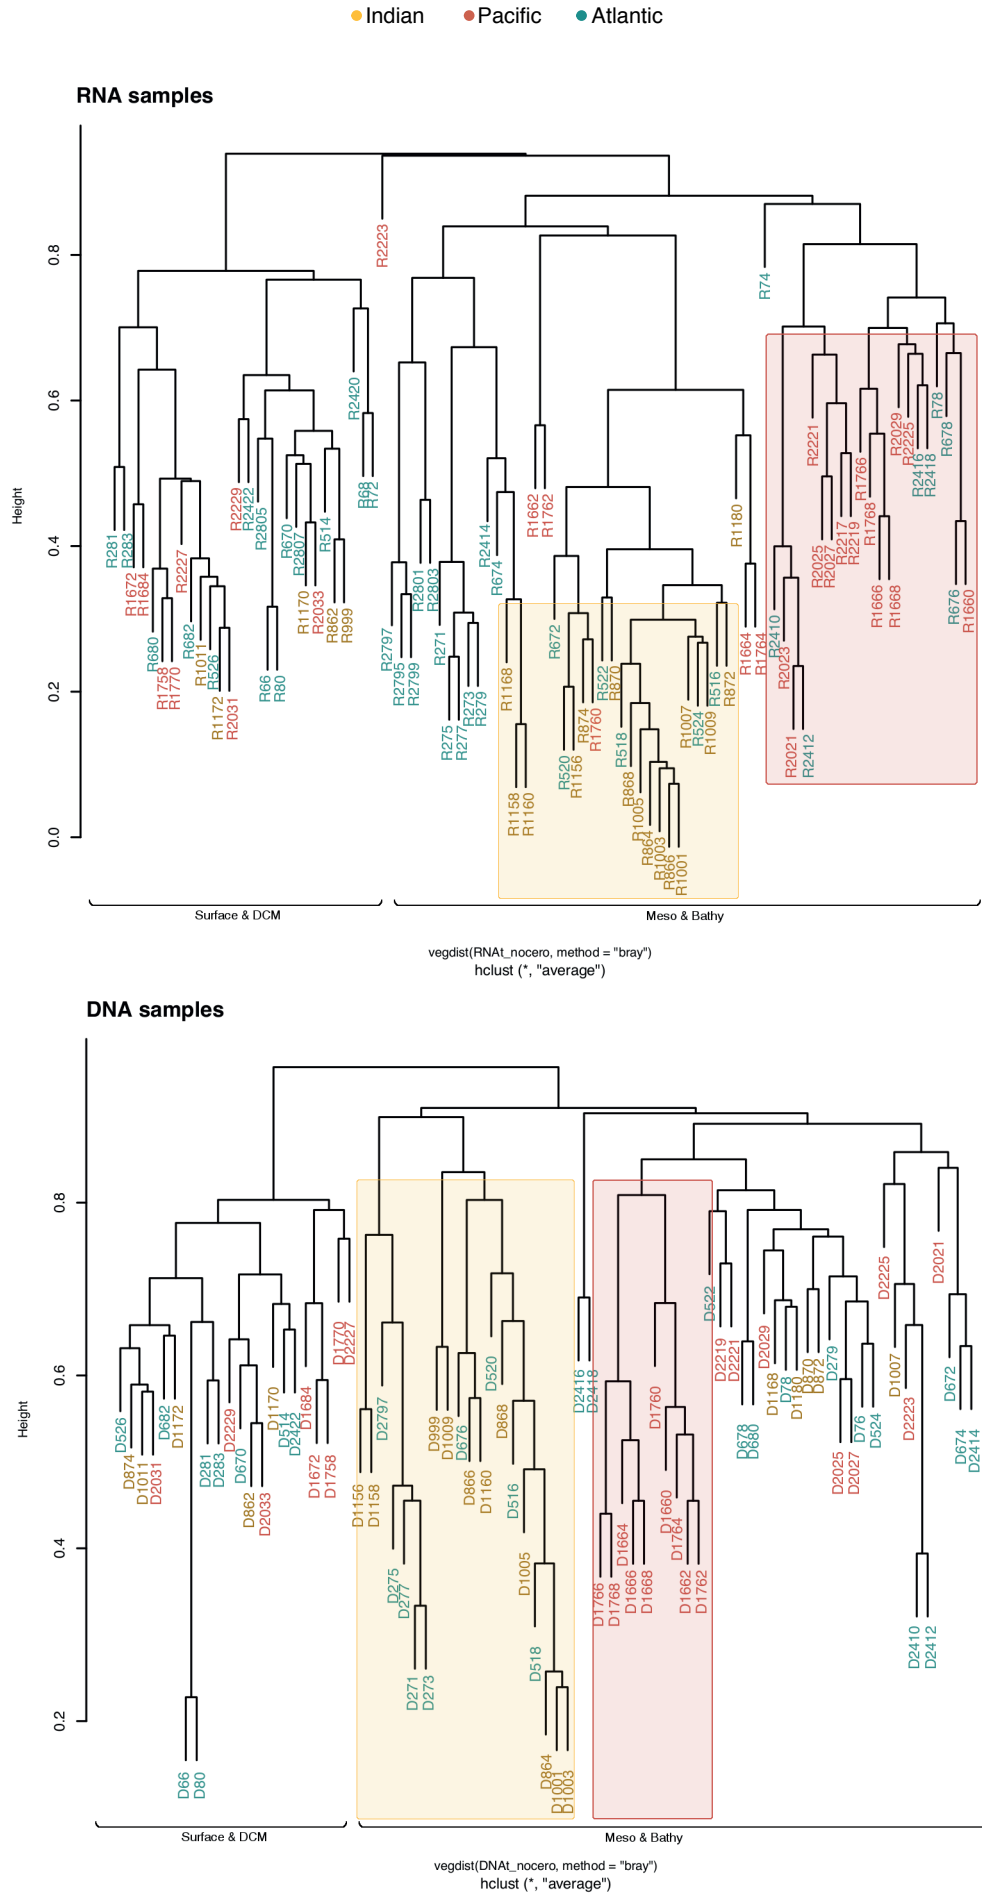

**Figure S6.** Main environmental variables and inorganic nutrient concentrations in the four layers of the water column (actual values as black dots and averaged values as brown lines).

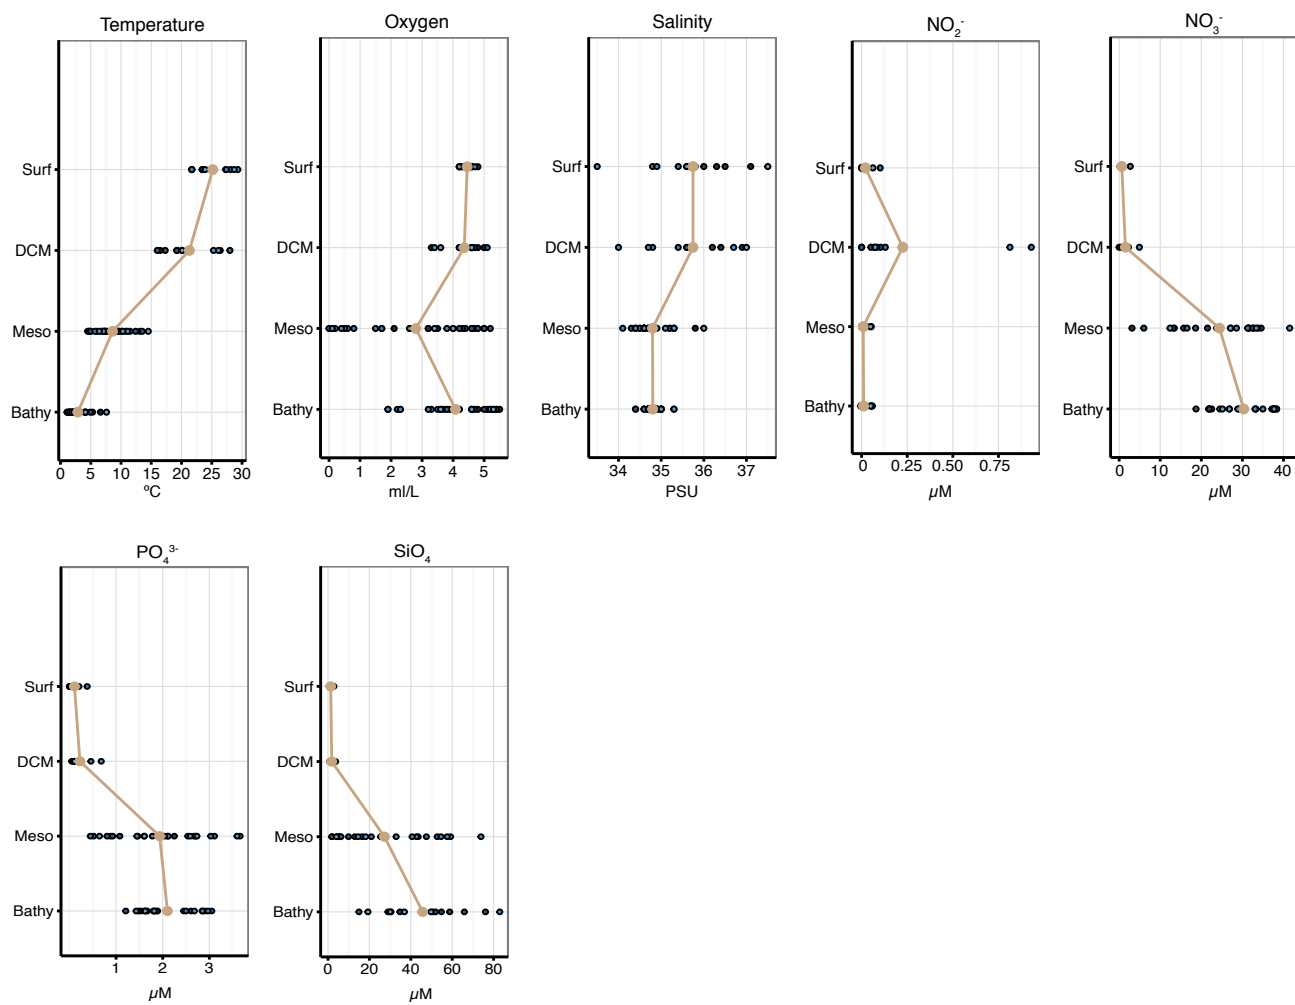

**Figure S7.** Representation of all phylogenetic groups based in the total abundance in the rRNA and rDNA surveys.

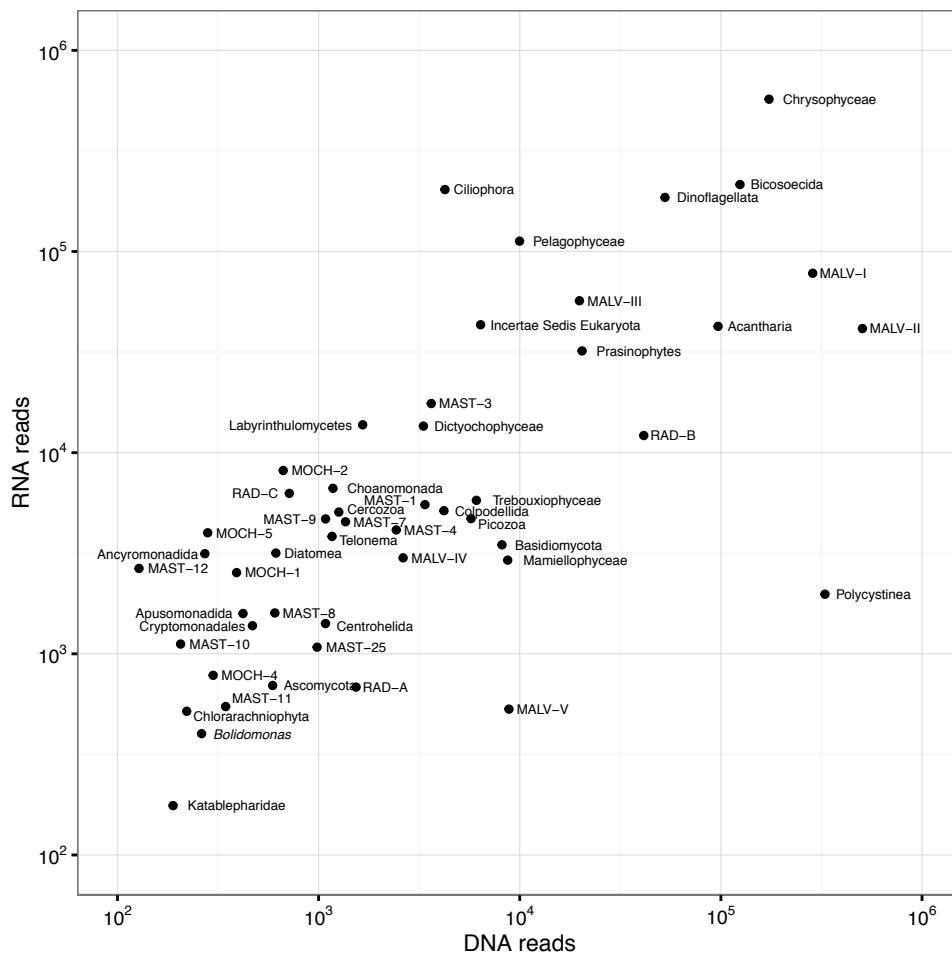

**Figure S8.** Relative abundance of the main taxonomic groups in the four water layers in the different ocean basins.

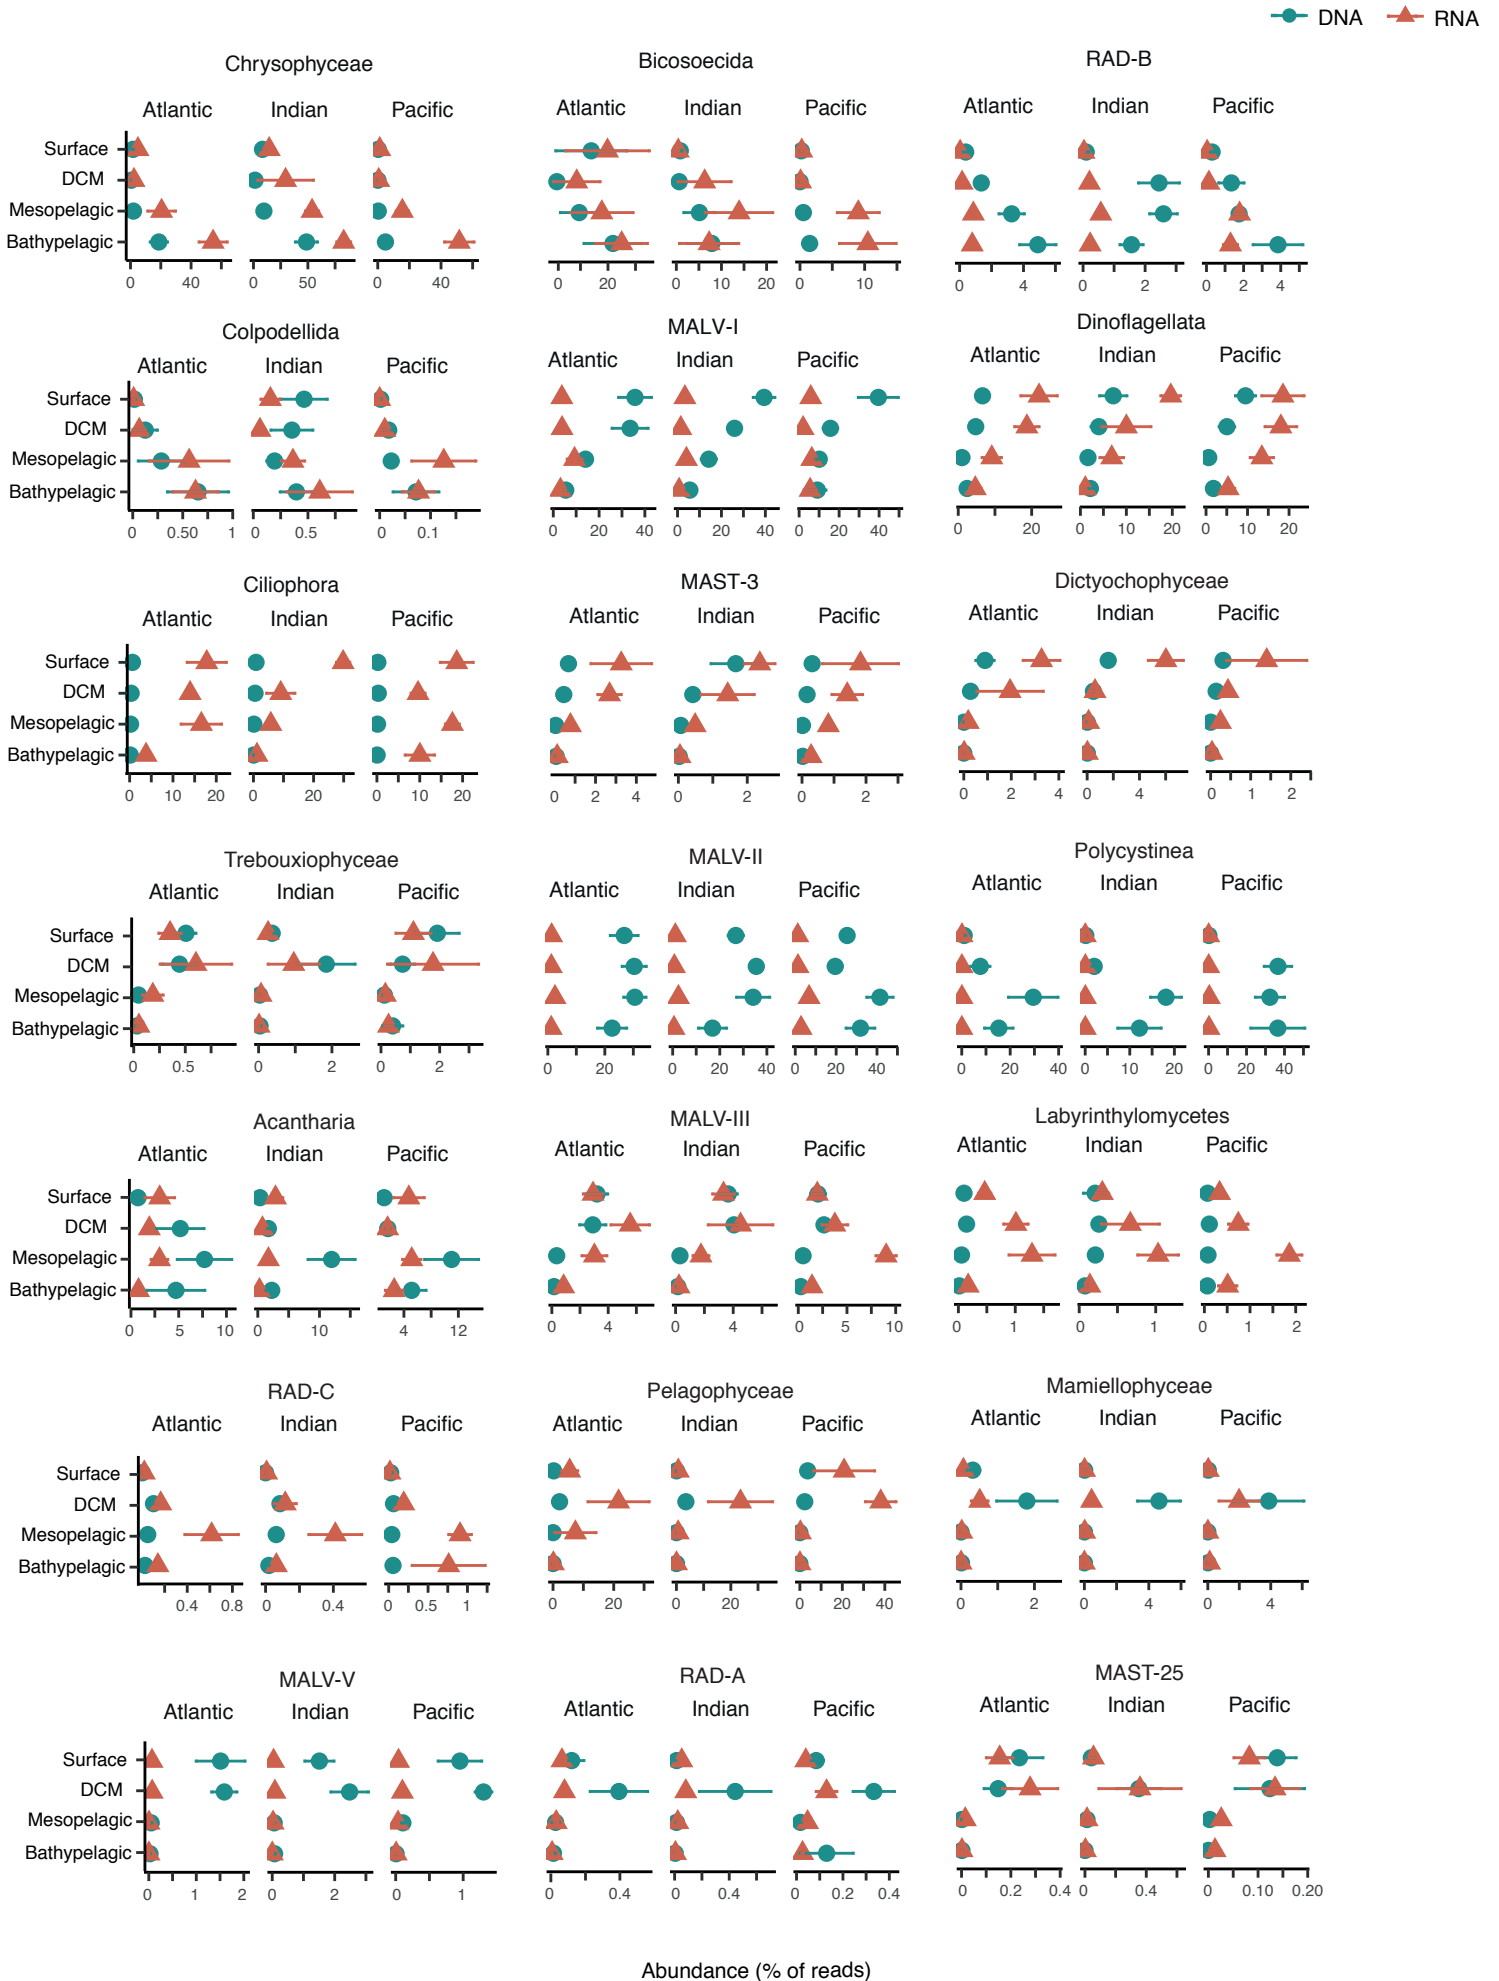



**Figure S9.** Distribution of the rRNA:rDNA ratios for all OTUs within a given depth layer. The red line indicates a ratio of 1.

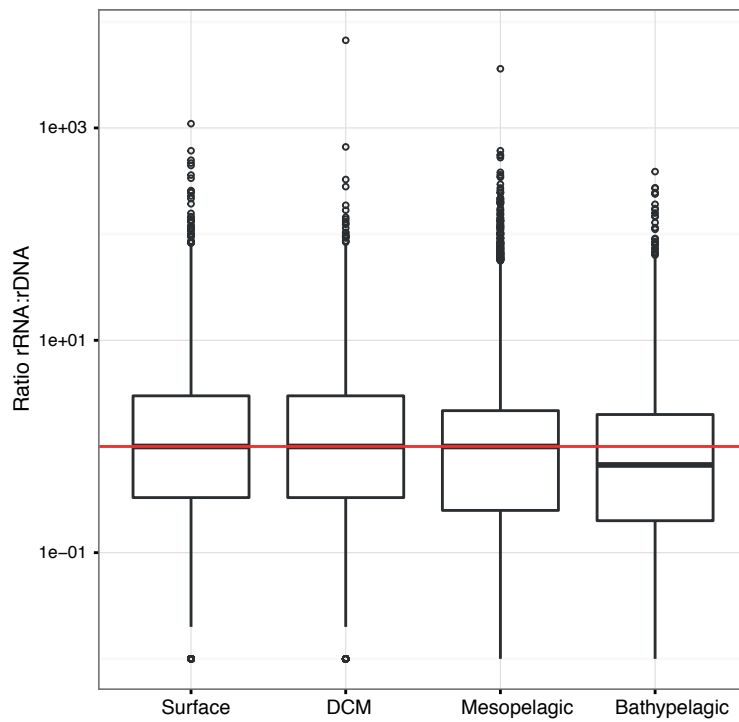

**Figure S10.** Distribution of the activity ratios (rRNA:rDNA) for all OTUs within major taxonomic groups in the four depth layers and the three oceans. The red line indicates a ratio of 1.

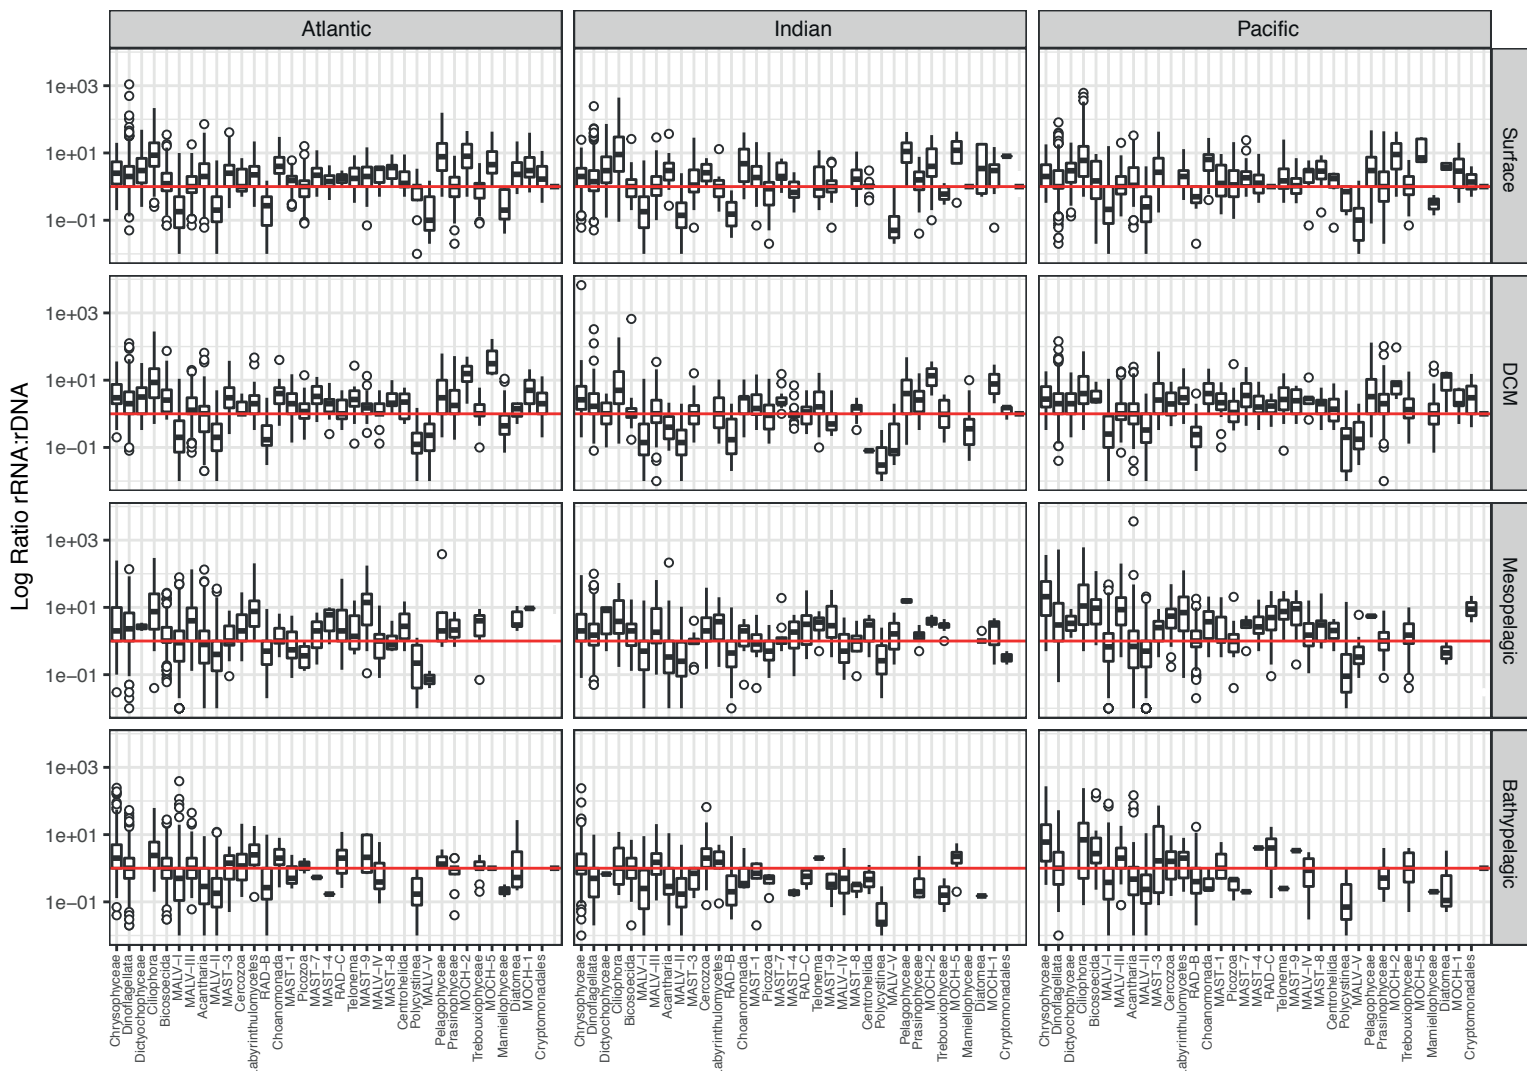

**Figure S11.** Activity ratios (rRNA:rDNA) of the OTUs of the four main taxonomic groups present at the four depths (surface, DCM, mesopelagic and bathypelagic).

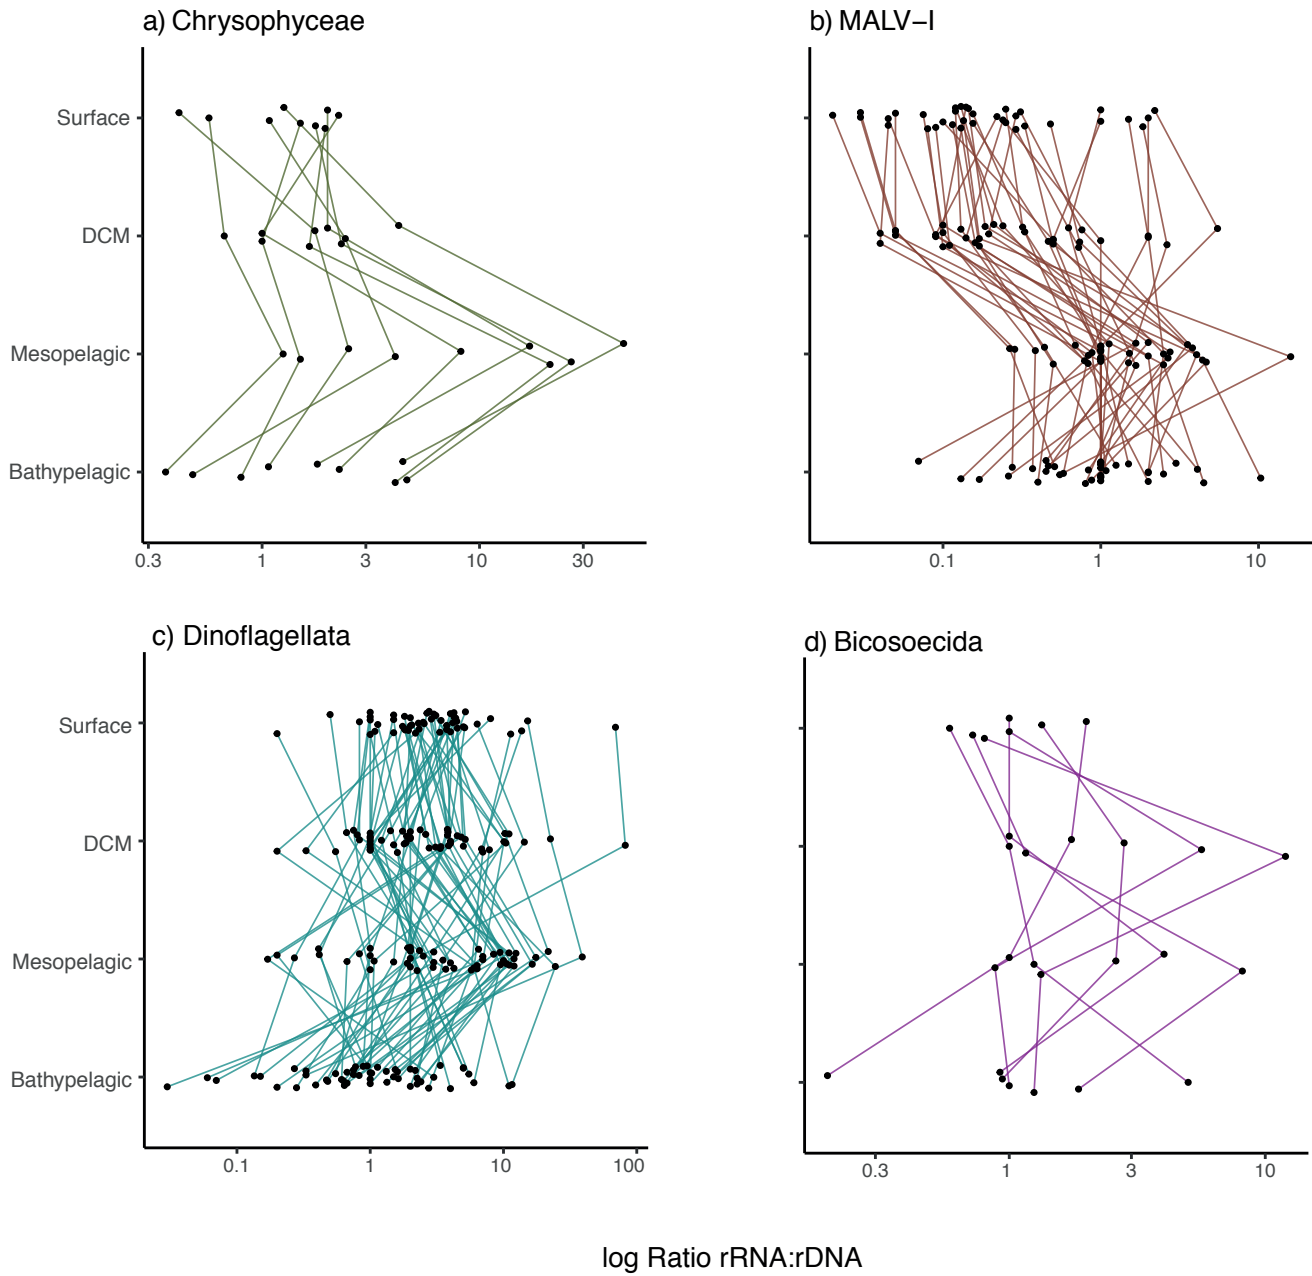

**Figure S12.** UPGMA dendrogram based on the gUniFrac distances between samples from different water layers.

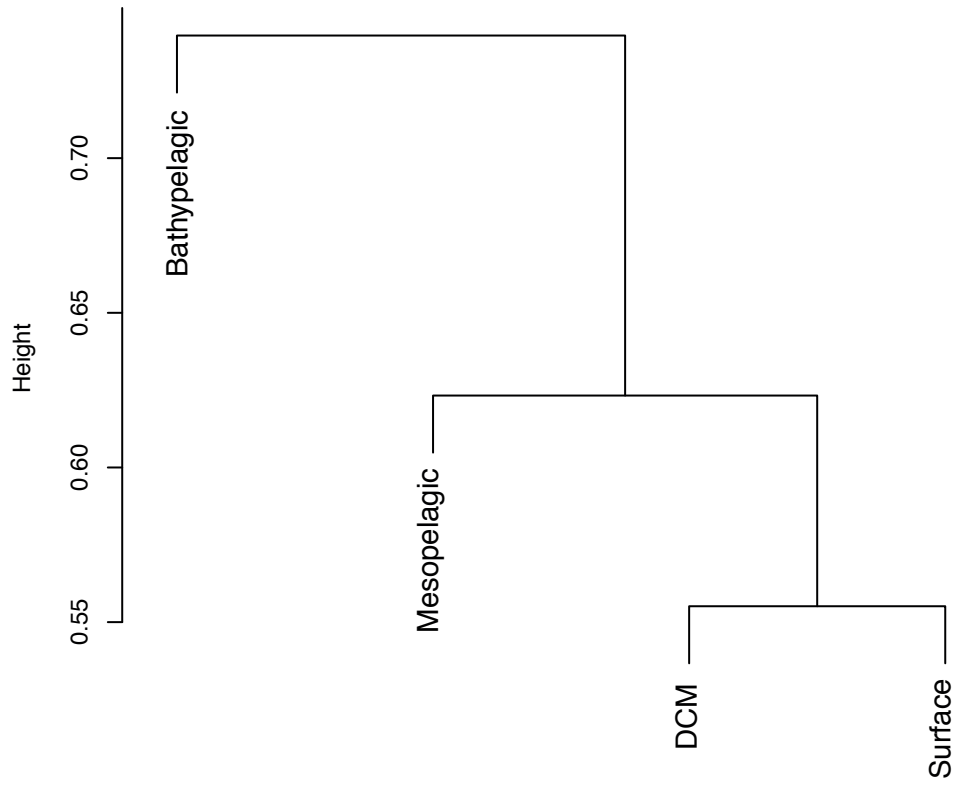

**Figure S13.** Clustering of all picoeukaryotic samples on a Non-metric multidimensional analysis (NMDS) based on Bray-Curtis dissimilarities differentiating between DSL (a, c) and OMZ (b, d) samples. Each sample is colored according to the specific depth layer.

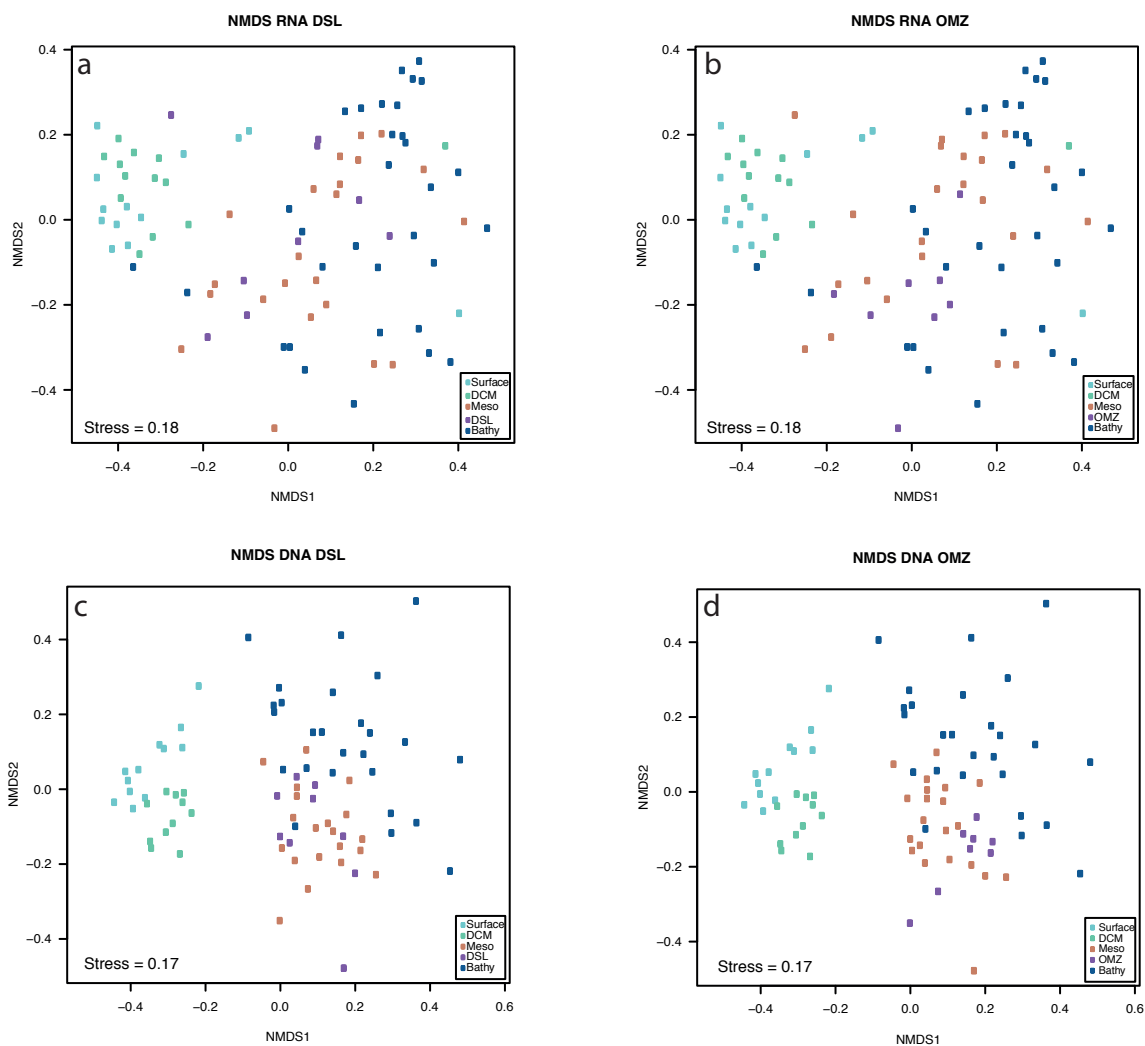

**Figure S14.** Richness in the different water layers defined as DSL (a) and OMZ (b).  
rRNA (upper boxplots) and rDNA (lower boxplots).

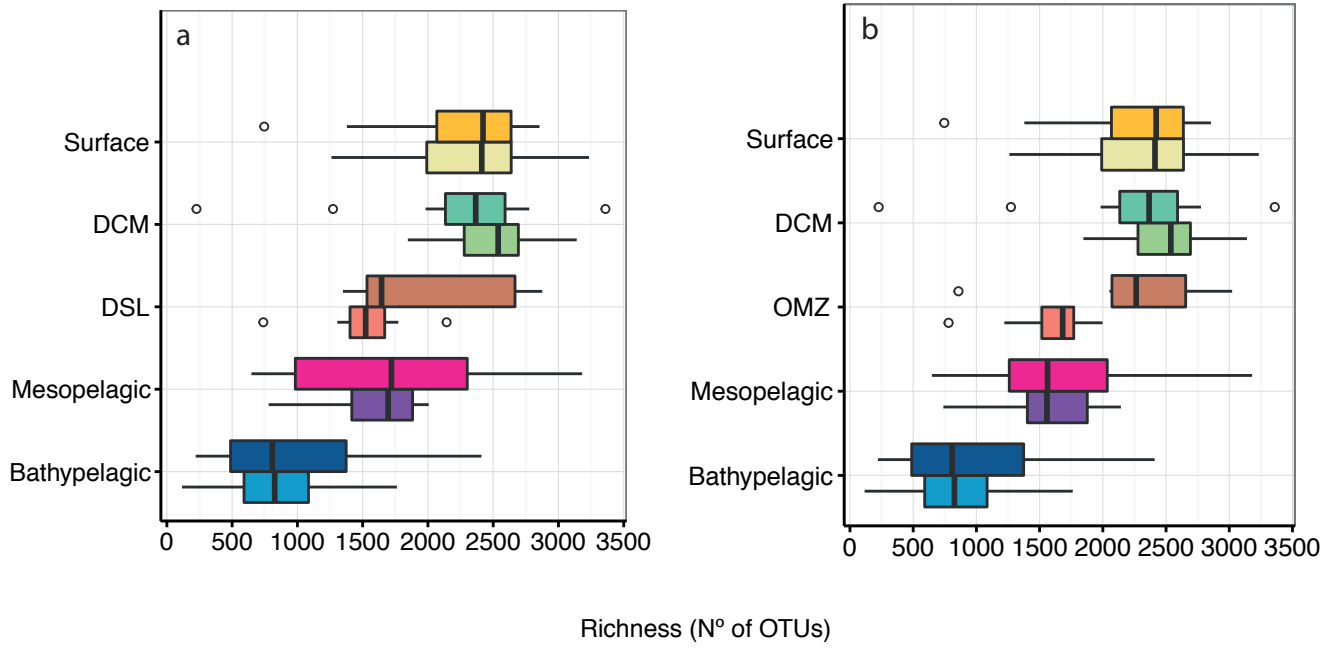

**Table S1.** Summary of the samples and environmental variables related.

| Sample | Station | Sampling Date | Depth (m) | Latitude | Longitude | Temp. (°C) | Salinity | O2 (ml/L) | Ocean basin | Water Mass |
|--------|---------|---------------|-----------|----------|-----------|------------|----------|-----------|-------------|------------|
| 66     | 6       | 12/22/2010    | 3         | 23.274   | -22.222   | 23.4       | 37.1     | 4.6       | Atlantic    | -          |
| 68     | 6       | 12/22/2010    | 4000      | 23.274   | -22.222   | 2.4        | 34.9     | 5.4       | Atlantic    | NADW2      |
| 72     | 6       | 12/22/2010    | 1250      | 23.274   | -22.222   | 6.6        | 35.3     | 4.0       | Atlantic    | NADW4.6    |
| 74     | 6       | 12/22/2010    | 970       | 23.274   | -22.222   | 7.4        | 35.2     | 3.2       | Atlantic    | NADW4.6    |
| 78     | 6       | 12/22/2010    | 430       | 23.274   | -22.222   | 13.1       | 35.8     | 3.5       | Atlantic    | ENACWp     |
| 80     | 6       | 12/22/2010    | 88        | 23.274   | -22.222   | 21.5       | 36.9     | 4.6       | Atlantic    | -          |
| 271    | 18      | 1/3/2011      | 3         | -4.779   | -28.169   | 27.3       | 36.3     | 4.3       | Atlantic    | -          |
| 273    | 18      | 1/3/2011      | 4000      | -4.779   | -28.169   | 2.0        | 34.9     | 5.5       | Atlantic    | NADW2      |
| 275    | 18      | 1/3/2011      | 1700      | -4.779   | -28.169   | 4.0        | 35.0     | 5.2       | Atlantic    | NADW4.6    |
| 277    | 18      | 1/3/2011      | 800       | -4.779   | -28.169   | 4.9        | 34.5     | 3.2       | Atlantic    | -          |
| 279    | 18      | 1/3/2011      | 450       | -4.779   | -28.169   | 7.7        | 34.7     | 2.1       | Atlantic    | AAIW5      |
| 281    | 18      | 1/3/2011      | 80        | -4.779   | -28.169   | 26.3       | 36.3     | 4.4       | Atlantic    | -          |
| 283    | 18      | 1/3/2011      | 110       | -4.779   | -28.169   | 21.2       | 36.4     | 3.3       | Atlantic    | -          |
| 514    | 30      | 1/22/2011     | 3         | -25.868  | -27.567   | 25.2       | 36.5     | 4.5       | Atlantic    | -          |
| 516    | 30      | 1/22/2011     | 4000      | -25.868  | -27.567   | 1.6        | 34.8     | 5.1       | Atlantic    | NADW2      |
| 518    | 30      | 1/22/2011     | 3300      | -25.868  | -27.567   | 2.5        | 34.9     | 5.4       | Atlantic    | NADW2      |
| 520    | 30      | 1/22/2011     | 2400      | -25.868  | -27.567   | 3.0        | 34.9     | 5.3       | Atlantic    | NADW2      |
| 522    | 30      | 1/22/2011     | 850       | -25.868  | -27.567   | 4.5        | 34.4     | 4.4       | Atlantic    | AAIW5      |
| 524    | 30      | 1/22/2011     | 550       | -25.868  | -27.567   | 9.3        | 34.7     | 4.3       | Atlantic    | 13EqAtl    |
| 526    | 30      | 1/22/2011     | 130       | -25.868  | -27.567   | 19.3       | 36.2     | 4.8       | Atlantic    | -          |
| 670    | 39      | 1/31/2011     | 3         | -30.882  | 0.968     | 21.7       | 36.0     | 4.8       | Atlantic    | -          |
| 672    | 39      | 1/31/2011     | 4000      | -30.882  | 0.968     | 1.7        | 34.8     | 4.8       | Atlantic    | NADW2      |
| 674    | 39      | 1/31/2011     | 3080      | -30.882  | 0.968     | 2.3        | 34.9     | 5.0       | Atlantic    | NADW2      |
| 676    | 39      | 1/31/2011     | 1290      | -30.882  | 0.968     | 3.1        | 34.6     | 3.9       | Atlantic    | AAIW3.1    |
| 678    | 39      | 1/31/2011     | 800       | -30.882  | 0.968     | 4.7        | 34.3     | 4.6       | Atlantic    | AAIW5      |
| 680    | 39      | 1/31/2011     | 540       | -30.882  | 0.968     | 8.5        | 34.6     | 4.0       | Atlantic    | AAIW5      |
| 682    | 39      | 1/31/2011     | 110       | -30.882  | 0.968     | 16.5       | 35.6     | 5.0       | Atlantic    | -          |
| 862    | 49      | 2/17/2011     | 3         | -33.907  | 37.042    | 23.5       | 35.7     | 4.6       | Indian      | -          |
| 864    | 49      | 2/17/2011     | 4000      | -33.907  | 37.042    | 1.1        | 34.7     | 4.7       | Indian      | WSDW       |
| 866    | 49      | 2/17/2011     | 3000      | -33.907  | 37.042    | 2.3        | 34.8     | -         | Indian      | NADW2      |
| 868    | 49      | 2/17/2011     | 1200      | -33.907  | 37.042    | 5.3        | 34.4     | 4.2       | Indian      | SAMW       |
| 870    | 49      | 2/17/2011     | 800       | -33.907  | 37.042    | 10.1       | 34.8     | 4.7       | Indian      | SAMW       |
| 872    | 49      | 2/17/2011     | 450       | -33.907  | 37.042    | 13.5       | 35.3     | 4.6       | Indian      | ICW13      |
| 874    | 49      | 2/17/2011     | 86        | -33.907  | 37.042    | 19.2       | 35.6     | 4.6       | Indian      | -          |
| 999    | 55      | 2/27/2011     | 3         | -29.354  | 69.400    | 25.3       | 35.6     | 4.4       | Indian      | -          |
| 1001   | 55      | 2/27/2011     | 4000      | -29.354  | 69.400    | 1.1        | 34.7     | 4.2       | Indian      | CDW        |
| 1003   | 55      | 2/27/2011     | 2500      | -29.354  | 69.400    | 1.9        | 34.7     | 3.7       | Indian      | CDW        |
| 1005   | 55      | 2/27/2011     | 1065      | -29.354  | 69.400    | 4.9        | 34.4     | 4.1       | Indian      | AAIW3.1    |
| 1007   | 55      | 2/27/2011     | 715       | -29.354  | 69.400    | 9.7        | 34.8     | 4.8       | Indian      | SAMW       |
| 1009   | 55      | 2/27/2011     | 400       | -29.354  | 69.400    | 12.4       | 35.2     | 5.0       | Indian      | ICW13      |
| 1011   | 55      | 2/27/2011     | 130       | -29.354  | 69.400    | 17.3       | 35.7     | 4.7       | Indian      | -          |
| 1156   | 63      | 3/7/2011      | 2600      | -29.574  | 96.407    | 1.8        | 34.7     | 3.8       | Indian      | CDW        |
| 1158   | 63      | 3/7/2011      | 950       | -29.574  | 96.407    | 5.0        | 34.4     | 4.2       | Indian      | AAIW3.1    |
| 1160   | 63      | 3/7/2011      | 1790      | -29.574  | 96.407    | 2.7        | 34.7     | 3.3       | Indian      | CDW        |
| 1168   | 63      | 3/7/2011      | 650       | -29.574  | 96.407    | 9.2        | 34.7     | 5.0       | Indian      | SAMW       |
| 1170   | 63      | 3/7/2011      | 3         | -29.574  | 96.407    | 21.7       | 35.8     | 4.6       | Indian      | -          |
| 1172   | 63      | 3/7/2011      | 115       | -29.574  | 96.407    | 16.0       | 35.7     | 5.1       | Indian      | -          |
| 1180   | 63      | 3/7/2011      | 420       | -29.574  | 96.407    | 10.8       | 34.9     | 5.2       | Indian      | SAMW       |
| 1660   | 92      | 4/29/2011     | 4000      | -3.410   | -169.463  | 1.4        | 34.7     | 3.6       | Pacific     | CDW        |
| 1662   | 92      | 4/29/2011     | 1500      | -3.410   | -169.463  | 3.0        | 34.6     | 2.3       | Pacific     | CDW        |
| 1664   | 92      | 4/29/2011     | 650       | -3.410   | -169.463  | 6.7        | 34.6     | 1.7       | Pacific     | CDW        |
| 1666   | 92      | 4/29/2011     | 580       | -3.410   | -169.463  | 7.4        | 34.6     | 1.5       | Pacific     | 13EqPac    |
| 1668   | 92      | 4/29/2011     | 450       | -3.410   | -169.463  | 8.5        | 34.7     | 1.7       | Pacific     | -          |
| 1672   | 92      | 4/29/2011     | 3         | -3.410   | -169.463  | 28.1       | 35.4     | 4.2       | Pacific     | -          |
| 1684   | 92      | 4/29/2011     | 65        | -3.410   | -169.463  | 28.0       | 35.4     | 4.2       | Pacific     | -          |
| 1758   | 96      | 5/3/2011      | 3         | 6.992    | -164.372  | 27.4       | 34.8     | 4.3       | Pacific     | -          |
| 1760   | 96      | 5/3/2011      | 4000      | 6.992    | -164.372  | 1.4        | 34.7     | 3.5       | Pacific     | CDW        |
| 1762   | 96      | 5/3/2011      | 2000      | 6.992    | -164.372  | 2.2        | 34.7     | 2.2       | Pacific     | CDW        |
| 1764   | 96      | 5/3/2011      | 750       | 6.992    | -164.372  | 6.0        | 34.6     | 0.8       | Pacific     | CDW        |
| 1766   | 96      | 5/3/2011      | 600       | 6.992    | -164.372  | 7.0        | 34.6     | 0.6       | Pacific     | 13EqPac    |
| 1768   | 96      | 5/3/2011      | 400       | 6.992    | -164.372  | 8.9        | 34.6     | 0.5       | Pacific     | 13EqPac    |
| 1770   | 96      | 5/3/2011      | 80        | 6.992    | -164.372  | 26.4       | 34.8     | 4.2       | Pacific     | -          |
| 2021   | 110     | 5/23/2011     | 4000      | 17.370   | -130.611  | 1.5        | 34.7     | 3.2       | Pacific     | CDW        |
| 2023   | 110     | 5/23/2011     | 2000      | 17.370   | -130.611  | 2.1        | 34.6     | 1.9       | Pacific     | CDW        |
| 2025   | 110     | 5/23/2011     | 500       | 17.370   | -130.611  | 7.3        | 34.5     | 0.2       | Pacific     | NPIW       |
| 2027   | 110     | 5/23/2011     | 400       | 17.370   | -130.611  | 8.2        | 34.4     | 0.4       | Pacific     | NPIW       |
| 2029   | 110     | 5/23/2011     | 200       | 17.370   | -130.611  | 11.5       | 34.1     | 3.8       | Pacific     | 13EqPac    |
| 2031   | 110     | 5/23/2011     | 110       | 17.370   | -130.611  | 20.1       | 34.7     | 4.6       | Pacific     | -          |
| 2033   | 110     | 5/23/2011     | 3         | 17.370   | -130.611  | 21.7       | 34.9     | 4.7       | Pacific     | -          |
| 2217   | 120     | 6/2/2011      | 2800      | 10.759   | -102.442  | 1.9        | 34.7     | 2.3       | Pacific     | CDW        |

|      |     |           |      |        |          |      |      |     |          |         |
|------|-----|-----------|------|--------|----------|------|------|-----|----------|---------|
| 2219 | 120 | 6/2/2011  | 2000 | 10.759 | -102.442 | 2.3  | 34.7 | 1.9 | Pacific  | CDW     |
| 2221 | 120 | 6/2/2011  | 780  | 10.759 | -102.442 | 5.7  | 34.6 | 0.1 | Pacific  | CDW     |
| 2223 | 120 | 6/2/2011  | 600  | 10.759 | -102.442 | 7.1  | 34.6 | 0.0 | Pacific  | 13EqPac |
| 2225 | 120 | 6/2/2011  | 280  | 10.759 | -102.442 | 11.1 | 34.8 | 0.1 | Pacific  | ENPCW   |
| 2227 | 120 | 6/2/2011  | 37   | 10.759 | -102.442 | 26.1 | 34.0 | 3.4 | Pacific  | -       |
| 2229 | 120 | 6/2/2011  | 3    | 10.759 | -102.442 | 29.3 | 33.5 | 4.2 | Pacific  | -       |
| 2410 | 128 | 6/21/2011 | 3100 | 14.158 | -71.673  | 4.2  | 35.0 | 4.6 | Atlantic | -       |
| 2412 | 128 | 6/21/2011 | 2400 | 14.158 | -71.673  | 4.1  | 35.0 | 4.6 | Atlantic | -       |
| 2414 | 128 | 6/21/2011 | 2000 | 14.158 | -71.673  | 4.1  | 35.0 | 4.6 | Atlantic | -       |
| 2416 | 128 | 6/21/2011 | 800  | 14.158 | -71.673  | 6.4  | 34.8 | 2.8 | Atlantic | -       |
| 2418 | 128 | 6/21/2011 | 460  | 14.158 | -71.673  | 10.3 | 35.1 | 2.6 | Atlantic | -       |
| 2420 | 128 | 6/21/2011 | 106  | 14.158 | -71.673  | 25.3 | 36.7 | 3.6 | Atlantic | -       |
| 2422 | 128 | 6/21/2011 | 3    | 14.158 | -71.673  | 28.7 | 35.6 | 4.2 | Atlantic | -       |
| 2795 | 141 | 7/5/2011  | 4000 | 26.911 | -32.837  | 2.4  | 34.9 | 5.2 | Atlantic | NADW2   |
| 2797 | 141 | 7/5/2011  | 2500 | 26.911 | -32.837  | 3.2  | 35.0 | 5.3 | Atlantic | NADW2   |
| 2799 | 141 | 7/5/2011  | 1000 | 26.911 | -32.837  | 7.6  | 35.3 | 3.6 | Atlantic | NADW4.6 |
| 2801 | 141 | 7/5/2011  | 900  | 26.911 | -32.837  | 8.4  | 35.3 | 3.4 | Atlantic | ENACWp  |
| 2803 | 141 | 7/5/2011  | 430  | 26.911 | -32.837  | 14.5 | 36.0 | 4.0 | Atlantic | ENACWt  |
| 2805 | 141 | 7/5/2011  | 150  | 26.911 | -32.837  | 20.1 | 37.0 | 4.6 | Atlantic | -       |
| 2807 | 141 | 7/5/2011  | 3    | 26.911 | -32.837  | 23.9 | 37.5 | 4.5 | Atlantic | -       |



**Table S2.** Results of the PERMANOVA analysis for the rDNA and rRNA datasets. For each dataset whole water column, and only epipelagic and deep-ocean depths had been analyzed.

|                                    | DNA                |         |                               |         |                                       |         |
|------------------------------------|--------------------|---------|-------------------------------|---------|---------------------------------------|---------|
|                                    | Whole Water column |         | Surface + DCM<br>(Epipelagic) |         | Meso + bathypelagic<br>(Deep – Ocean) |         |
|                                    | R2                 | p-value | R2                            | p-value | R2                                    | p-value |
| <b>Light</b><br>(presence/absence) | 0.14               | 0.001   | -                             | -       | -                                     | -       |
| <b>Temperature</b>                 | 0.04               | 0.001   | 0.11                          | 0.002   | 0.08                                  | 0.001   |
| <b>Salinity</b>                    | 0.01               | 0.139   | 0.06                          | 0.082   | 0.03                                  | 0.021   |
| <b>Water Mass</b>                  | -                  | -       | -                             | -       | <b>0.24</b>                           | 0.045   |
| <b>O<sub>2</sub></b>               | 0.04               | 0.001   | 0.07                          | 0.014   | 0.06                                  | 0.001   |
| <b>Ocean</b>                       | 0.05               | 0.001   | 0.12                          | 0.039   | 0.08                                  | 0.001   |
| <b>Depth</b>                       | 0.07               | 0.001   | 0.09                          | 0.001   | 0.01                                  | 0.783   |
| <b>NO<sub>3</sub><sup>-</sup></b>  | 0.01               | 0.511   | 0.04                          | 0.374   | 0.02                                  | 0.275   |
| <b>PO<sub>4</sub><sup>3-</sup></b> | 0.02               | 0.042   | 0.04                          | 0.740   | 0.02                                  | 0.105   |
| <b>SiO<sub>4</sub></b>             | 0.01               | 0.445   | 0.04                          | 0.704   | 0.02                                  | 0.386   |
| <b>DAPI</b>                        | 0.01               | 0.122   | 0.05                          | 0.268   | 0.01                                  | 0.864   |
| <b>Conductivity</b>                | 0.02               | 0.017   | 0.04                          | 0.495   | 0.03                                  | 0.017   |

|                                    | RNA                |         |                               |         |                                       |         |
|------------------------------------|--------------------|---------|-------------------------------|---------|---------------------------------------|---------|
|                                    | Whole Water column |         | Surface + DCM<br>(Epipelagic) |         | Meso + bathypelagic<br>(Deep – Ocean) |         |
|                                    | R2                 | p-value | R2                            | p-value | R2                                    | p-value |
| <b>Light</b><br>(presence/absence) | 0.15               | 0.001   | -                             | -       | -                                     | -       |
| <b>Temperature</b>                 | 0.03               | 0.001   | 0.08                          | 0.045   | 0.05                                  | 0.001   |
| <b>Salinity</b>                    | 0.02               | 0.017   | 0.09                          | 0.032   | 0.04                                  | 0.023   |
| <b>Water Mass</b>                  | -                  | -       | -                             | -       | <b>0.25</b>                           | 0.040   |
| <b>O<sub>2</sub></b>               | 0.06               | 0.001   | 0.04                          | 0.296   | 0.02                                  | 0.173   |
| <b>Ocean</b>                       | 0.06               | 0.001   | 0.13                          | 0.052   | 0.07                                  | 0.006   |
| <b>Depth</b>                       | 0.07               | 0.001   | 0.11                          | 0.004   |                                       |         |
| <b>NO<sub>3</sub><sup>-</sup></b>  | 0.01               | 0.227   | 0.03                          | 0.777   | 0.01                                  | 0.989   |
| <b>PO<sub>4</sub><sup>3-</sup></b> | 0.02               | 0.077   | 0.03                          | 0.563   | 0.02                                  | 0.260   |
| <b>SiO<sub>4</sub></b>             | 0.01               | 0.819   | 0.02                          | 0.872   | 0.01                                  | 0.506   |
| <b>DAPI</b>                        | 0.01               | 0.268   | 0.08                          | 0.038   | 0.02                                  | 0.317   |
| <b>Conductivity</b>                | 0.01               | 0.343   | 0.04                          | 0.438   | 0.02                                  | 0.320   |

**Table S3.** Number of total OTUs in each water layer and of the unique OTUs within them in the DNA and RNA dataset.

**DNA**

| <b>Depth</b> | <b>Total OTUs</b> | <b>N° of reads</b> | <b>OTUs unique</b> | <b>N° reads unique</b> | <b>%reads unique</b> |
|--------------|-------------------|--------------------|--------------------|------------------------|----------------------|
| Surface      | 5968              | 259,490            | 765                | 11,221                 | 4.3                  |
| DCM          | 6741              | 239,147            | 849                | 16,989                 | 7.1                  |
| Mesopelagic  | 8106              | 643,049            | 1652               | 47,084                 | 7.3                  |
| Bathypelagic | 6117              | 578,182            | 584                | 14,549                 | 2.5                  |

**RNA**

| <b>Depth</b> | <b>Total OTUs</b> | <b>N° of reads</b> | <b>OTUs unique</b> | <b>N° reads unique</b> | <b>%reads unique</b> |
|--------------|-------------------|--------------------|--------------------|------------------------|----------------------|
| Surface      | 6171              | 285,018            | 386                | 5,415                  | 1.9                  |
| DCM          | 6891              | 285,525            | 284                | 3,339                  | 1.2                  |
| Mesopelagic  | 9622              | 685,314            | 1221               | 22,967                 | 3.35                 |
| Bathypelagic | 8046              | 711,808            | 314                | 4,510                  | 0.6                  |
